# Supplementary material
Source: publisher figshare collection journal article supplement (https://gsapubs.figshare.com/ndownloader/files/30579156)
Supplement: Supplementary file 1 [file 30579156]

## Sheet: Sheet1
TABLE S3. RESULTS OF SELECTED TRACE ELEMENT ANALYSES (CONTENTS IN PPM) OF JURASSIC-AGED ZIRCONS BY LA-ICP-MS FROM EARLY–MIDDLE JURASSIC SUCCESSION IN NORTHWESTERN ZHEJIANG
Sample/Spot	Age	U	Nb	Ta	Ce	Nd	Sm	Eu	Ti	Gd	Tb	Dy	Y	Ho	Er	Tm	Yb	Lu	Zr	Hf	*Ti-in-zircon temperature (°C)	Ce/Nd	Log10(U/Yb)	Log10(Nb/Yb)
CS02-07	196.873	696.06	5.66	2.643	13.16	17.54	40.58	21.19	1.13	156.85	42.42	328.15	2572.37	81.97	296.84	57.47	554.76	109.68	415429	10908.5	579.639	0.750285	0.0985415	-1.99129
CS02-08	194.825	129.39	2.071	0.636	26.15	2.05	4.43	1.789	9.57	22.41	8.6	105.69	1348.56	44.21	214.68	48.92	509.02	107.24	464111	8363.22	736.973	12.7561	-0.594834	-2.39055
CS02-09	194.307	345.73	2.625	0.774	21.29	5.27	4.34	0.828	3.81	21.73	8.42	110.39	1404.66	45.84	220.89	49.1	507.33	105.23	427449	8579.54	662.553	4.03985	-0.166553	-2.28616
CS02-12	193.564	118.95	0.493	0.269	4.4	0.861	2.33	0.354	6.74	14.3	4.72	55.12	582.05	20.21	88.08	17.75	163.7	31.58	451139	8187.55	707.291	5.11034	-0.138684	-2.5212
CS02-21	195.502	475.03	7.54	2.524	22.65	6.91	4.76	0.354	3.57	28.51	11.18	140.87	1588.11	56.34	253.93	51.56	475.88	88.41	456451	10130.1	657.708	3.27786	-0.000776415	-1.80013
CS02-26	191.799	679.5	1.759	1.565	6.64	0.292	1.233	0.229	2.03	7.37	3.28	50.16	753.22	22.91	123.8	30.43	338.23	73.55	432763	12099	617.687	22.7397	0.302977	-2.28395
CS02-29	189.298	212.26	1.199	0.319	12.81	4.39	6.85	0.855	5.72	33.16	11.12	125.03	1330.85	47.31	203.74	40.75	386.24	75.01	434780	7427.91	693.989	2.918	-0.259989	-2.50804
CS02-36	186.667	383.12	3.86	0.888	54.93	26.31	10.19	1.065	4.37	32.77	11.75	146.88	1592.79	55.93	244.08	49.21	466.97	88.65	478942	10578.6	672.931	2.0878	-0.0859542	-2.0827
CS02-37	192.144	981.32	2.95	2.192	12.9	1.059	1.65	0.315	1.24	12.06	5.39	76.49	1142.76	34.66	183.48	44.85	500.32	107.79	428854	11368.5	585.454	12.1813	0.292563	-2.22943
CS02-40	190.343	409.02	3.01	0.605	17.35	2.27	4.79	1.097	5.67	26.88	10.53	138.87	1796.74	58.29	281.02	63.39	637.41	130.18	455336	8105.5	693.288	7.64317	-0.192674	-2.32585
CS02-40	195.209	365.6	8.25	2.159	45.75	6.22	6.33	0.268	3.55	30.32	10.83	138.77	1566.76	54.66	246.57	51.91	498.3	94.6	423307	9199.69	657.292	7.35531	-0.134485	-1.78104
CS02-46	193.971	251.44	3.89	1.084	66.5	22	6.66	1.045	5.06	20.68	7.15	90.74	1144.77	37.72	184.55	40.96	423.62	86.12	445783	8350.19	684.284	3.02273	-0.226542	-2.03703
CS02-49	191.448	536.95	3.39	1.665	20.13	0.782	2.45	0.127	4.15	13.1	5.42	75.39	958.94	31.36	154.84	35.3	361.55	73.23	467849	10663.6	668.995	25.7417	0.171765	-2.02797
CS02-59	193.63	357.79	4.09	1.193	20.8	3.87	2.96	0.094	6.79	14.58	5.61	70.18	847.21	28.61	133.64	28.12	277.88	52.5	464009	11118.7	707.899	5.37468	0.109771	-1.83213
CS02-71	193.75	372.91	5.74	1.731	37.43	3.29	3.9	0.534	3.59	23.64	9.32	128.8	1588.36	53.68	252.56	55.21	538.29	106.41	459625	12064.5	658.122	11.3769	-0.159412	-1.9721
CS04-015	199.6	642	1.548	0.78	12.54	2.89	4.16	1.017	2.56	22.46	7.94	95.81	1189.41	37.77	178.08	39.93	419.59	87.39	453473	10156.8	633.708	4.3391	0.18471	-2.43305
CS04-016	195.9	221.73	0.853	0.398	24.09	7.17	5.26	0.711	4.72	21.74	7.57	91.29	1066.88	35.38	163.98	34.8	338.03	67.53	441394	9875.41	678.864	3.35983	-0.183131	-2.59801
CS04-034	188	276.73	1.012	0.496	8.81	0.885	1.79	0.567	5.42	9.97	3.66	46.57	637.86	20.03	99.82	23.61	257.82	57.19	454334	8876.54	689.701	9.9548	0.0307396	-2.40614
CS04-035	191.5	149.86	0.9	0.277	9.01	4.14	5.6	1.139	9.04	25.06	7.97	89.27	922.94	32.92	141.34	28.6	272.58	53.74	454947	6914.34	732.028	2.17633	-0.259808	-2.48125
CS04-037	186	543.25	3.71	1.292	19.18	1.49	4.17	0.571	4.8	22.54	8.4	109.38	1312.19	43.66	209.86	46.15	465.02	92.96	462442	9640.85	680.168	12.8725	0.0675281	-2.0981
CS04-062	190.4	326.72	2.104	0.424	17.72	1.94	4.24	1.149	6.78	23.82	8.79	120.25	1521.09	50.81	239.54	51.79	530.02	108.9	465415	7605.53	707.778	9.13402	-0.210117	-2.40125
CS04-064	194	650.16	1.739	1.023	17.3	0.924	2.44	0.417	4.13	12.81	4.99	64.84	832	26.47	130.91	29.45	304.88	64.05	466611	10864.1	668.628	18.7229	0.328891	-2.24383
CS04-070	185.1	372.57	0.72	0.399	16.68	3.89	4.51	0.898	4.75	19.41	6.37	74.22	892.58	29.09	134.69	29.75	303.62	62.9	440689	9987.41	679.355	4.28792	0.0888775	-2.625
CS04-072	193	184.23	1.839	0.592	32.87	4.6	7.67	2.62	7.35	34.11	12.31	145.2	1637.45	56.31	252.82	52.83	511.94	101.37	437192	8160.76	714.463	7.14565	-0.443859	-2.44464
CS04-074	203	1306.27	9.75	2.123	18.04	4.96	13.98	0.111	1.12	88.93	33.99	415.44	4414.51	156.55	666.02	126.5	1105.15	192.68	468791	10481.6	579.087	3.6371	0.0726117	-2.05442
CS04-090	197.4	517.4	2.088	0.811	23.76	3.81	7.29	1.307	1.73	33.7	11.63	142.58	1755.63	56.02	264.87	57.3	589.15	120.71	470501	11025.4	606.968	6.23622	-0.0563995	-2.4505
CS04-093	189.8	506.93	1.182	0.714	14.43	2.96	4.92	1.199	3.22	23.82	8.29	97.56	1196	38.27	180.69	39.66	400.98	84.03	450789	9707.77	650.126	4.875	0.101825	-2.53051
TS02-03	170.8	219.92	0.719	0.464	98.8	28.64	5.26	0.965	4.37	7.93	2.15	24.46	289.3	9.02	41.09	9.54	97.1	21.09	510746	10510.9	672.931	3.44972	0.355045	-2.13049
TS02-04	173.1	235.41	1.028	0.583	24.18	3.24	1.95	0.602	6.27	7.64	2.77	32	391.5	12.23	57.31	13.24	138.96	29.6	502578	10479.8	701.387	7.46296	0.228935	-2.1309
TS02-14	182.1	361.54	2.271	0.604	45.32	3.32	4.05	1.392	2.82	17.55	6.05	72.17	1054.45	30.7	155.04	37.42	416.38	91.79	481890	10442.3	640.56	13.6506	-0.0613335	-2.26327
TS02-15	178.4	270.79	1.953	0.945	21.21	0.819	1.8	0.591	2.39	10.33	3.95	47.19	564.53	17.95	85.03	18.56	190.86	39.59	480335	9833.15	628.902	25.8974	0.151918	-1.99001
TS02-19	179.3	607.13	5.55	2.47	16.29	0.562	1.64	0.822	2.14	13.05	5.73	76.84	1091.41	32.98	168.27	39.89	435.95	92.86	482811	11219.3	621.281	28.9858	0.143845	-1.89514
TS02-23	172.4	385.42	2.042	1.071	24.55	0.92	1.99	0.732	3.52	10.81	4.02	46.83	523.98	17.39	78.16	16.64	166.58	33.5	495862	10530.2	656.664	26.6848	0.364311	-1.91157
TS02-25	176.7	229.83	7	1.674	79.7	7.1	4.37	1.632	5.18	23.81	9.05	109.15	1370.57	43.89	207.85	45.15	450.58	89.04	500576	8569.85	686.124	11.2254	-0.292365	-1.80867
TS02-36	181.8	408.6	1.91	1.037	27.86	1.2	2.69	0.894	3.67	12.75	4.33	53.57	594.12	19.28	90.26	19.3	192.37	38.64	475307	9792.18	659.759	23.2167	0.327161	-2.0031
TS02-37	183	92.42	1.434	0.344	31.72	9.95	14.75	8.11	15.54	54.61	14.94	151.15	1432.62	50.22	204.41	40.65	382.1	74.06	493451	6615.69	781.109	3.18794	-0.616411	-2.42563
TS02-41	176.3	269.66	1.73	0.845	23.24	0.86	2.11	0.693	4.6	11.04	3.79	45.6	557.48	17.59	84.01	18.33	187.29	39.48	525603	10337.6	676.872	27.0233	0.158302	-2.03447
TS02-42	176	309.38	1.996	0.579	40.5	2.76	4.34	1.605	3.51	19.49	6.64	79.6	1042.25	31.53	155.47	35.55	388.34	82.77	489940	9900.17	656.454	14.6739	-0.0987199	-2.28905
TS02-45	187.9	270.87	5.72	1.161	49.62	1.23	2.12	0.833	4.45	11.61	4.42	59.91	873.69	26.28	138.22	32.81	365.45	79.98	481564	9020.1	674.321	40.3415	-0.130067	-1.80543
TS02-52	181.5	391.59	1.89	0.88	27.29	1.1	2.34	0.828	4.75	12.37	4.5	51	575.43	18.94	84.48	17.9	176.49	35.9	487462	9816.17	679.355	24.8091	0.346111	-1.97026
TS02-53	182.6	307.46	1.538	0.684	18.46	1.19	2.56	0.785	5.88	13.32	4.72	54.03	619.8	20.31	90.08	19.53	195.55	38.9	490106	10094.5	696.2	15.5126	0.196531	-2.1043
TS02-54	179.4	178.06	1.198	0.62	16.22	0.564	1.08	0.352	3.55	5.83	2.233	27.53	354.78	10.87	52.89	12.33	134.73	29.44	484511	9731.99	657.292	28.7589	0.121102	-2.05101
TS02-57	184.4	305.59	3.3	0.947	37.95	0.553	1.27	0.46	3.6	6.73	2.54	33.59	494.28	14.42	74.44	18.44	209.83	46.16	495749	10525.4	658.328	68.6257	0.163272	-1.80335
TS02-59	193	404.17	5.86	1.2	69.26	3.7	5.47	1.97	2.62	26.73	8.99	110.33	1433.79	44.57	211.74	47.92	502.27	106.55	487865	9393.16	635.34	18.7189	-0.0943732	-1.93304
TS02-60	181.7	238.91	1.231	0.596	17.04	0.604	1.43	0.423	4.82	6.82	2.4	27.69	319.63	10.67	47.37	10.56	106.24	21.27	483881	9932.11	680.491	28.2119	0.351946	-1.93603
TS02-61	184	217.96	4.62	0.944	47.64	0.96	1.78	0.684	2.24	9.64	3.69	49.51	747.29	22.13	115.51	28.1	307.53	68.06	487168	9330.29	624.416	49.625	-0.149511	-1.82325
TS02-65	183.8	227.24	3.12	0.833	46.66	3.15	4.92	1.854	4.06	23.08	8.26	98.29	1172.57	37.58	172.91	37.68	373.79	74.48	483977	8411.09	667.334	14.8127	-0.216143	-2.07847
TS02-82	169.9	109.15	1.008	0.315	18.11	4.15	6.75	2.52	15.62	29.36	9.29	99.57	1013.78	35.05	148.61	29.34	274.63	53.41	509724	8270.14	781.597	4.36386	-0.400724	-2.43529
TS02-83	175.5	159.65	2.48	0.715	34.05	0.9	2.23	0.944	3.83	13.6	4.98	62.23	777.51	24.85	118.12	26.59	267.64	53.52	503293	8327.98	662.945	37.8333	-0.224382	-2.0331
TS02-89	179.8	281.53	2.45	0.961	28.7	1.64	3.44	1.241	6.49	16.62	6.09	70.41	814.22	26.89	120.18	26.22	262.62	52.7	492789	9004.88	704.195	17.5	0.0301969	-2.03016
TS02-92	185.2	224.11	4.86	1.23	40.98	1.14	1.91	0.753	3.72	10.42	3.96	53.12	759.39	23.02	119.41	28.22	307.94	66.99	491216	8767.82	660.767	35.9474	-0.138005	-1.80183
TS02-94	179.9	858.61	3.11	2.18	10.92	0.92	1.93	0.533	1.91	11.16	4.79	63.46	877.47	27.16	138.06	32.72	350.83	75.27	501528	11146.5	613.572	11.8696	0.388699	-2.05234
TS03-13	174.5	437.98	3.55	1.606	6.86	0.482	2.24	0.288	1.44	13.68	5.71	75.29	912.23	30.56	145.29	31.15	314.51	62.99	493813	11137.4	594.983	14.2324	0.14382	-1.94741
TS03-34	176.3	150.42	1.97	0.619	48.32	8.14	12.31	5.12	6.38	50.05	15.91	169.6	1731.54	58.55	246.96	49	460.76	84.19	486387	7584.73	702.801	5.93612	-0.486169	-2.36901
TS03-42	176.8	116.22	1.305	0.458	19.81	2.14	3.56	1.31	13.58	15.85	5.42	60.91	710.15	23.45	105.97	22.4	221.81	44.29	473204	8282.41	768.453	9.25701	-0.2807	-2.23037
TS03-52	186.2	245.74	2.25	0.675	10.42	1.61	4.05	0.652	38.32	20.64	7.16	82.61	838.31	29.22	125.57	24.67	229.34	43.03	449868	9621.1	874.464	6.47205	0.029996	-2.0083
TS03-62	182.3	103.93	0.664	0.237	5.29	0.98	1.85	0.553	7.11	8.96	2.92	36.69	398.05	13.71	61.04	12.48	123.06	25.26	461328	7837.73	711.703	5.39796	-0.073376	-2.26795
TS03-81	175.8	210.9	1.008	0.395	8.08	1.68	2.98	0.225	28.59	12.74	4.66	51.24	553.07	18.67	81.41	16.73	159.25	30.33	475011	8986.76	842.405	4.80952	0.121997	-2.19862
TS03-86	170	689.09	1.325	0.628	9.8	4.12	8.04	1.174	1.92	39.23	13.37	154.56	1745.82	58.01	256.23	52.55	497.34	96.38	484858	9705.76	613.923	2.37864	0.141623	-2.57444
YSJ-032	180.4	214.96	2.692	0.922	50.91	4.61	2.96	1.27	4.96	14.67	5	60.49	680.93	22.77	102.42	21.98	217.77	42.44	439227	8769.25	682.722	11.0434	-0.0056404	-1.90792
YSJ-050	183.6	304.44	3.37	0.876	56.23	4.81	7.98	3.01	3.56	33.45	11.32	131.38	1518.73	49.01	221.05	47.58	477.05	92.32	447527	8709.22	657.5	11.6902	-0.195062	-2.15093
YSJ-066	184.2	577.51	3.17	0.83	44.63	4.67	4.34	1.286	3.3	15.7	5.01	59.06	702.38	21.82	102.22	23.13	248.74	54.01	438722	10247.6	651.918	9.55675	0.365814	-1.89469
YSJ-083	191.4	357.87	2.495	1.05	15.97	2.021	3.96	1.528	7.48	23.03	8.7	106.6	1286.62	41.22	188.87	40.27	408.05	84.22	455253	9059.25	715.928	7.90203	-0.0569881	-2.21364
YSJ-096	184.4	86.89	1.072	0.303	14.86	1.669	3.09	1.339	6.08	14.75	4.99	58.98	731.61	23	110.35	26.02	282.89	61.91	451769	8486.91	698.895	8.90354	-0.512648	-2.42142
YSJ-105	179.4	535.44	5.73	1.37	56.35	1.07	1.95	0.657	3.06	9.79	3.67	46.85	682.83	19.61	102.59	24.94	279.31	59.4	442550	10422.3	646.427	52.6636	0.282624	-1.68793
LA01-23	175.5	509.63	1.145	0.701	12.84	2.64	5.11	0.97	2.21	27.53	8.91	95.8	978.41	32.5	132.43	25.89	239.35	44.9	458673	10480.2	623.488	4.86364	0.328222	-2.32023
LA01-50	174.6	423.48	1.193	0.819	9.99	0.887	2.3	0.413	3.1	12.99	4.76	52.58	572.17	19	79.04	15.9	145.67	26.93	472987	10471.5	647.367	11.2627	0.463463	-2.08673
LA01-65	176.2	475.49	1.89	0.931	10.81	1.49	2.8	0.466	3.72	15.92	5.62	67.01	752.36	24.77	108.47	22.72	217.71	42.62	466578	10159.8	660.767	7.25503	0.339263	-2.06142
LA01-76	175.5	480.95	1.328	0.939	13.09	0.98	2.69	0.403	4.83	15.87	5.62	62.99	648.23	21.87	90.26	17.29	157.71	28.96	464149	10481.4	680.652	13.3571	0.484241	-2.07466
Note: *Ti-in-zircon thermometry used for the concordant zircons is from Ferry et al. (2007).
